# Supplementary material for: Mucosal Challenge Ferret Models of Ebola Virus Disease
Source: PubMed Central journal article supplement (PMC8001755; doi:10.3390/pathogens10030292), 2021-03-04
Supplement: pathogens-10-00292-s001.pdf [file pathogens-10-00292-s001.pdf]

Article

# Mucosal Challenge Ferret Models of Ebola Virus Disease

Trevor Brasel <sup>1\*</sup>, Jason E. Comer <sup>1</sup>, Shane Massey <sup>1</sup>, Jeanon Smith <sup>1</sup>, Jennifer Smith <sup>2</sup>, Matthew Hyde <sup>3</sup>, Andrew Kocsis <sup>3</sup>, Melicia Gainey <sup>4</sup>, Nancy Niemuth <sup>4</sup>, Cheryl Triplett<sup>4</sup> and Thomas Rudge, Jr. <sup>4</sup>

<sup>1</sup> University of Texas Medical Branch, Department of Microbiology and Immunology, 301 University Blvd., Galveston, TX, 77573; trbrasel@utmb.edu; jscomer@utmb.edu; chmassey@utmb.edu; jensmit1@utmb.edu

<sup>2</sup> University of Texas Medical Branch, Department of Pathology, 301 University Blvd., Galveston, TX, 77573; jeksmith@utmb.edu

<sup>3</sup> University of Texas Medical Branch, Animal Resources Center, 301 University Blvd., Galveston, TX, 77573; mahyde@utmb.edu; agkocsis@utmb.edu

<sup>4</sup> Battelle; 1425 Plain City-Georgesville Road, NE, West Jefferson, OH, 43162; GaineyM@battelle.org; niemuth@battelle.org; triplettc@battelle.org; rudget@battelle.org

\* Correspondence: trbrasel@utmb.edu; Tel.: +1-409-266-6907

## Supplemental Material

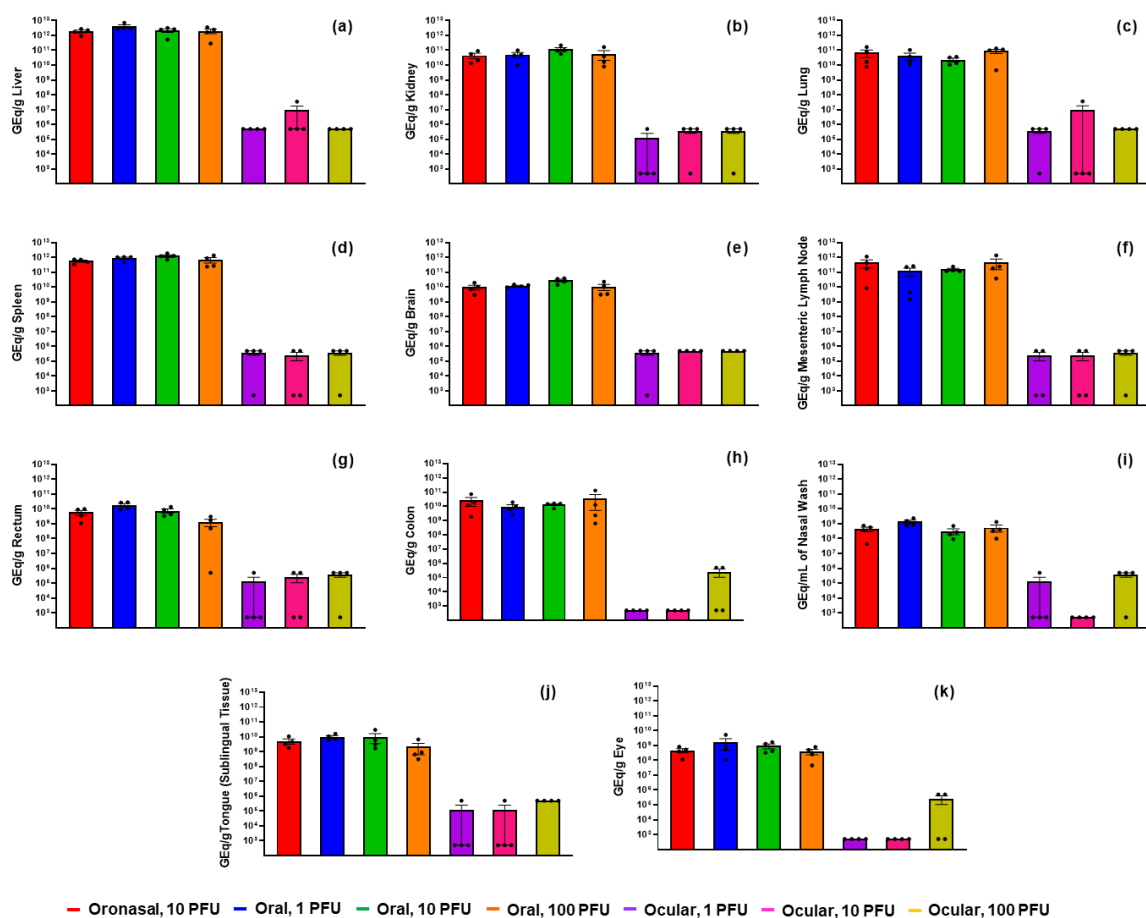

**Figure 1. Viral RNA in tissue.** From each ferret, select tissues and nasal wash were collected and analyzed for EBOV via qRT-PCR. (a) Liver; (b) kidney; (c) lung; (d) spleen; (e) brain; (f) mesenteric lymph node; (g) rectum; (h) colon; (i) nasal wash; (j) tongue [sublingual tissue]; (k) eye. Error bars represent standard error of the mean. GEq/g, EBOV genome equivalents per gram of tissue. Samples

that lacked detectable signal following PCR amplification were assigned a value of 500 GEq/g (or mL for nasal wash), representing one-half the limit of detection on a per mL basis. Amplified samples that quantified to values below the lowest tested standard (1,000 GEq/ $\mu$ L) were assigned a value of  $5 \times 10^5$  GEq/g (or mL for nasal wash), representing one-half the lower limit of quantitation on a per mL basis.
